# Supplementary material
Source: PubMed Central journal article supplement (PMC10071307)
Supplement: NIHMS1861238-supplement-2.pdf [file NIHMS1861238-supplement-2.pdf]

**Table S1.** Cryo-EM collection parameters, analysis, and final resolutions. Related to the STARS Method section.

| <b>Data collection</b>                          | Muddy                      | Bridgette                   | October96                   | Ziko                        | Bobi                       | Adephagia                   | Che8                       | Cozz                        | Ogopogo                    | Cain                        |
|-------------------------------------------------|----------------------------|-----------------------------|-----------------------------|-----------------------------|----------------------------|-----------------------------|----------------------------|-----------------------------|----------------------------|-----------------------------|
| Microscope                                      | Titan Krios 3Gi            |                             |                             |                             |                            |                             |                            |                             |                            |                             |
| High Tension / kV                               | 300                        |                             |                             |                             |                            |                             |                            |                             |                            |                             |
| Pixel size / Å                                  | 1.076                      | 0.6615                      | 0.39915                     | 0.4008                      | 0.83                       | 0.4008                      | 0.83                       | 0.413                       | 0.83                       | 0.4008                      |
| Spherical aberration / mm                       | 2.7                        |                             |                             |                             |                            |                             |                            |                             |                            |                             |
| Nominal defocus / $\mu\text{m}$                 | 1 to 2.5                   | 1 to 3                      | 1 to 3                      | 1 to 3                      | 1 to 3                     | 1 to 2.5                    | 1 to 3                     | 1 to 3                      | 1 to 3                     | 1 to 2.5                    |
| Detector (mode)                                 | Falcon III (Counting mode) | Gatan K3 (super resolution) | Gatan K3 (super resolution) | Gatan K3 (super resolution) | Falcon III (Counting mode) | Gatan K3 (super resolution) | Falcon III (Counting mode) | Gatan K3 (super resolution) | Falcon III (Counting mode) | Gatan K3 (super resolution) |
| Total exposure dose / $\text{e}\text{\AA}^{-2}$ | 50                         | 23                          | 30                          | 26                          | 30                         | 24                          | 30                         | 24                          | 30                         | 25                          |
| Number of frames                                | 48                         | 40                          | 32                          | 30                          | 32                         | 50                          | 32                         | 30                          | 32                         | 30                          |
| Number of micrographs                           | 1027                       | 4303                        | 10437                       | 5058                        | 1915                       | 5688                        | 1201                       | 2799                        | 2220                       | 4368                        |
| Number of particles in final refinement         | 25244                      | 13926                       | 13198                       | 35950                       | 18969                      | 51783                       | 14972                      | 43611                       | 18736                      | 31878                       |
| Extract box size (fourier crop box size)        | 800 (800)                  | 1600 (800)                  | 2048 (800)                  | 2400 (750)                  | 1024 (686)                 | 2400 (800)                  | 1024 (800)                 | 2400 (800)                  | 1024 (800)                 | 2400 (800)                  |
| Final pixel size used in reconstruction         | 1.076                      | 1.323                       | 1.02182                     | 1.28256                     | 1.24                       | 1.2024                      | 1.0624                     | 1.239                       | 1.0624                     | 1.2024                      |
| Ewald sphere correction mask diameter           | 710                        | 700                         | 650                         | 760                         | 750                        | 760                         | 750                        | 670                         | 750                        | 760                         |
| Symmetry                                        | 1 (I4)                     | 1 (I1)                      | 1 (I1)                      | 1 (I4)                      | 1 (I1)                     | 1 (I1)                      | 1 (I1)                     | 1 (I1)                      | 1 (I1)                     | 1 (I2)                      |
| Resolution (FSC 0.143)                          | 2.7                        | 4                           | 2.2                         | 2.6                         | 2.5                        | 2.4                         | 2.5                        | 2.6                         | 2.7                        | 2.9                         |

**Table S2.** Host and bacteriophage information for each bacteriophage used in this study. Related to the STARS Method section.

| Phage name       | MCP<br>pham | Cluster/Sub-<br>cluster | Host                                                 | Genome<br>length | Growth<br>temp.<br>(°C) |
|------------------|-------------|-------------------------|------------------------------------------------------|------------------|-------------------------|
| <i>Oxtober96</i> | 15199       | EA/EA1                  | <i>Microbacterium<br/>foliorum</i> NRRL B-24224      | 41798            | 32                      |
| <i>Bridgette</i> | 15199       | FA                      | <i>Arthrobacter globiformis</i> B-<br>2979           | 43113            | 32                      |
| <i>Muddy</i>     | 15199       | AB                      | <i>Mycobacterium<br/>smegmatis mc<sup>2</sup>155</i> | 48228            | 37                      |
| <i>Bob</i>       | 15199       | F/F1                    | <i>Mycobacterium<br/>smegmatis mc<sup>2</sup>155</i> | 59179            | 37                      |
| <i>Adephagia</i> | 15199       | K/K1                    | <i>Mycobacterium<br/>smegmatis mc<sup>2</sup>155</i> | 59646            | 37                      |
| <i>Cain</i>      | 15199       | K/K6                    | <i>Mycobacterium<br/>smegmatis mc<sup>2</sup>155</i> | 60813            | 22                      |
| <i>Ziko</i>      | 15199       | DP                      | <i>Gordonia terrae</i> 3612                          | 68860            | 32                      |
| <i>Ogopogo</i>   | 57445       | F/F1                    | <i>Mycobacterium<br/>smegmatis mc<sup>2</sup>155</i> | 56867            | 37                      |
| <i>Cozz</i>      | 57445       | CT                      | <i>Gordonia terrae</i> 3612                          | 46600            | 32                      |
| <i>Che8</i>      | 4631        | F/F1                    | <i>Mycobacterium<br/>smegmatis mc<sup>2</sup>155</i> | 59471            | 37                      |

**Table S3.** RMSD values of the Bobi-like (pham 15199) cryo-EM derived major capsid protein models when compared to Bobi. Values are calculated using the Matchmaker command in ChimeraX with default settings. Related to Figure 5.

| <i>Bacteriophage</i> | <i>RMSD (Å) compared to Bobi</i> |
|----------------------|----------------------------------|
| <i>Muddy</i>         | 1.0                              |
| <i>Bridgette</i>     | 1.2                              |
| <i>Oxtober96</i>     | 1.1                              |
| <i>Ziko</i>          | 1.1                              |
| <i>Adephagia</i>     | 0.6                              |

**Table S4. Hydrogen bonds between the A<sub>1</sub> and A<sub>2</sub> loops.** Hydrogen bonds and salt bridges specific to the A<sub>1</sub> and A<sub>2</sub> loops were determined in ChimeraX<sup>57</sup>. Related to Figure 6.

| <i>Bacteriophage name</i> | <i>Intermolecular bonds</i> | <i>Intramolecular bonds</i> |
|---------------------------|-----------------------------|-----------------------------|
| <i>Adephagia</i>          | 3                           | 32                          |
| <i>Bobi</i>               | 5                           | 32                          |
| <i>Ziko</i>               | 6                           | 31                          |
| <i>Muddy</i>              | 8                           | 24                          |
| <i>Oxtober96</i>          | 8                           | 25                          |
| <i>Bridgette</i>          | 4                           | 43                          |

**Table S5. Hydrogen bonds in the local 3-fold axis.** Hydrogen bonds and salt bridges specific to the P-loop in a single local 3-fold axis were assessed in ChimeraX<sup>57</sup>. The number of bonds between all the major capsid proteins that are involved in the local 3-fold was determined using PDBsum<sup>87</sup>. Related to Figure 6.

| <i>Bacteriophage name</i> | <i>P-loop hydrogen bonds</i> | <i>P-loop salt bridges</i> | <i>3-fold hydrogen bonds</i> | <i>3-fold salt bridges</i> |
|---------------------------|------------------------------|----------------------------|------------------------------|----------------------------|
| <i>Adephagia</i>          | 41                           | 9                          | 207                          | 73                         |
| <i>Bobi</i>               | 18                           | 3                          | 201                          | 90                         |
| <i>Ziko</i>               | 18                           | 3                          | 236                          | 89                         |
| <i>Muddy</i>              | 24                           | 0                          | 273                          | 65                         |
| <i>Oxtober96</i>          | 16                           | 0                          | 246                          | 108                        |
| <i>Bridgette</i>          | 19                           | 3                          | 198                          | 79                         |

**Table S6. Refinement and validation statistics of the structures deposited in the PDB.** Calculated with Phenix v1.19. Related to the STARS Method section.

|                          | Adephagia | Bobi  | Bridgette | Cain  | Chester | Cozy  | Muddy | Ogopogo | Oxtober 96 | Ziko  |
|--------------------------|-----------|-------|-----------|-------|---------|-------|-------|---------|------------|-------|
| Protein residues         | 2763      | 2709  | 2453      | 2754  | 2448    | 2205  | 2208  | 2772    | 2128       | 2898  |
| CC (volume)              | 0.85      | 0.84  | 0.82      | 0.85  | 0.84    | 0.82  | 0.77  | 0.83    | 0.84       | 0.84  |
| <b>R.M.S. Deviations</b> |           |       |           |       |         |       |       |         |            |       |
| Bond lengths (Angstroms) | 0.01      | 0.015 | 0.011     | 0.01  | 0.01    | 0.011 | 0.011 | 0.011   | 0.014      | 0.011 |
| Bond angles (°)          | 1.914     | 1.971 | 1.910     | 1.888 | 1.888   | 1.920 | 1.964 | 1.911   | 1.946      | 2.008 |
| Molprobit score          | 0.82      | 1.03  | 0.94      | 0.77  | 0.75    | 0.78  | 0.71  | 0.78    | 0.65       | 0.89  |
| Clash score              | 0.1       | 0.23  | 0.25      | 0.17  | 0.22    | 0.49  | 0.21  | 0.34    | 0.31       | 0.35  |
| Rotamer outliers (%)     | 0.19      | 1.58  | 0.84      | 0.43  | 0       | 0.93  | 1.07  | 0.5     | 0          | 1.03  |
| <b>Ramachandran</b>      |           |       |           |       |         |       |       |         |            |       |
| Favored regions (%)      | 95.96     | 95.76 | 94.99     | 96.78 | 97.04   | 97.44 | 97.45 | 97.13   | 97.87      | 96.25 |
| Allowed regions (%)      | 3.97      | 4.20  | 5.01      | 3.22  | 2.96    | 2.46  | 2.55  | 2.87    | 2.13       | 3.75  |
| Disallowed regions (%)   | 0.07      | 0.04  | 0         | 0     | 0       | 0.09  | 0     | 0       | 0          | 0     |

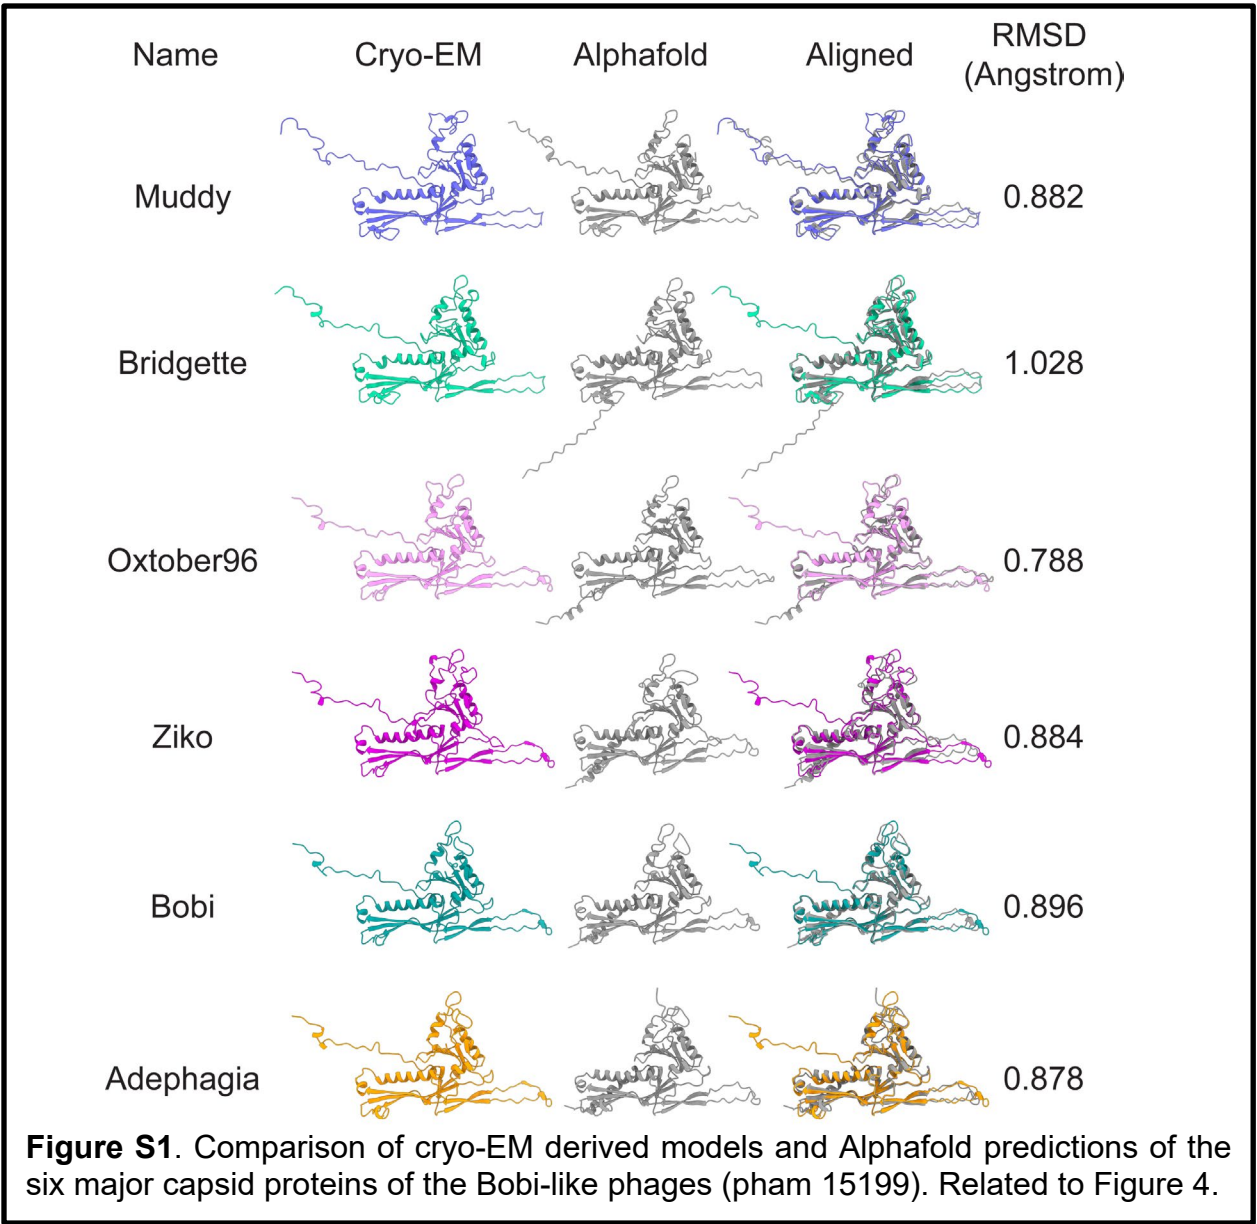

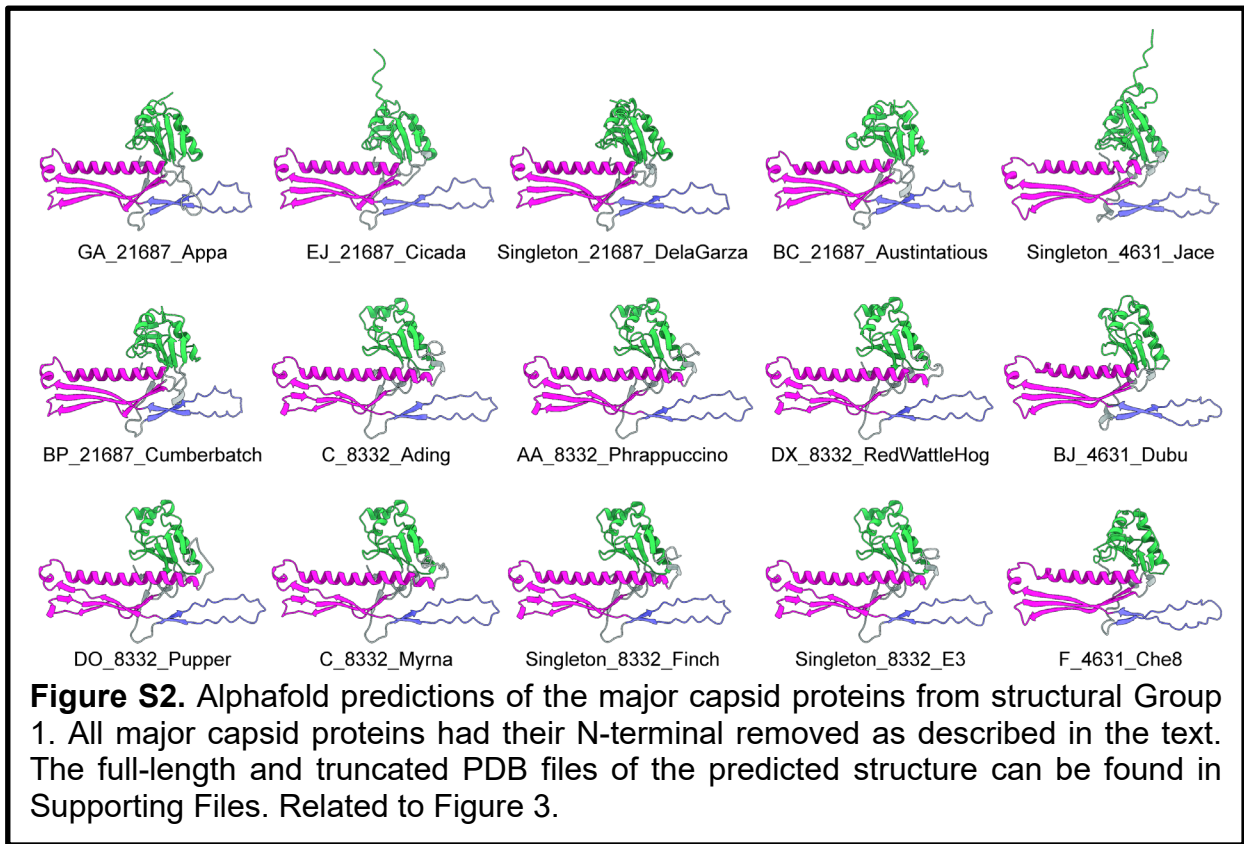

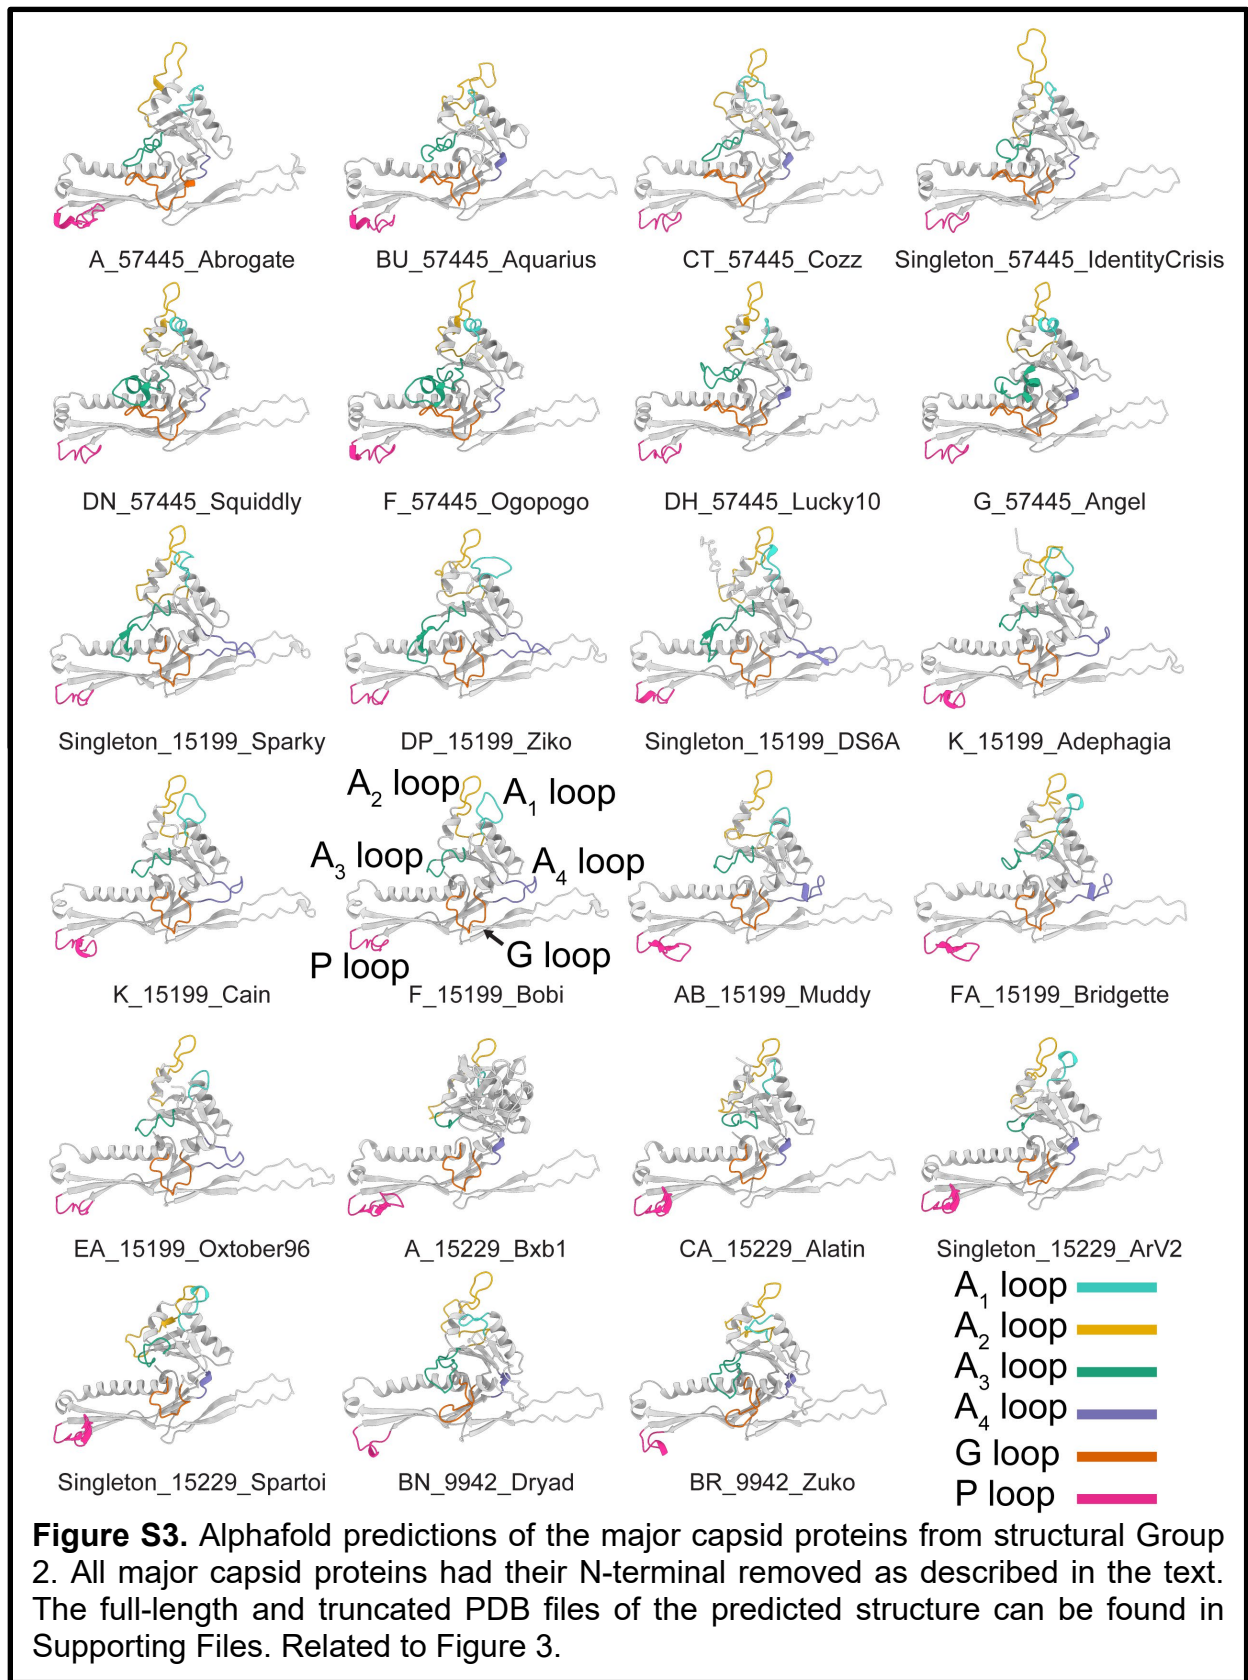



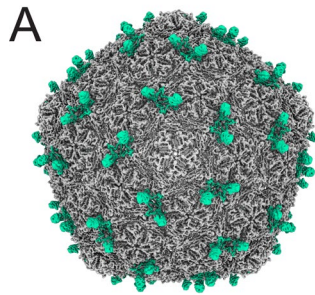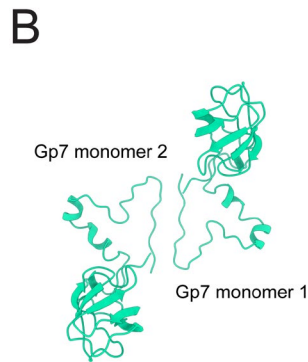

**Figure S4.** The decoration protein of Bridgette (Gp7). A shows the entire Bridgette capsid with the decoration protein dimers (Gp7) colored. B shows the model of the Gp7 (amino acids 2-125) dimer in the context of the capsid. Related to Figure 4.

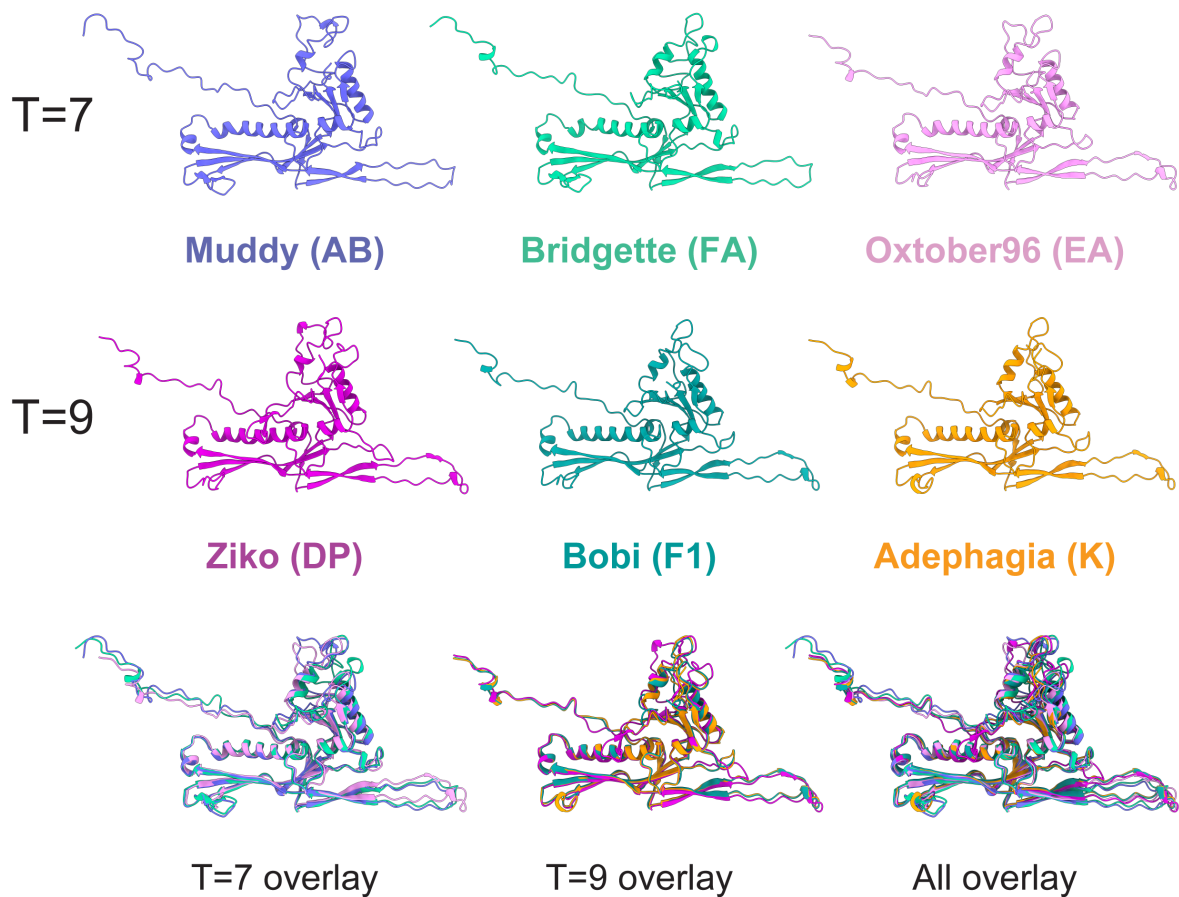

**Figure S5. Models of the representative bacteriophages from the Bobi-like (15199) family of major capsid proteins.** Model of each major capsid protein derived from the cryo-EM maps. Each model is of the hexamer subunit adjacent to the pentamer subunit, so models are directly comparable. Color coding is by phage cluster and is consistent with previous figures. The T=7 forming capsids (Muddy, Bridgette, and Oxtober96) are overlaid, as are the T=9 forming capsids (Ziko, Bobi, and Adephagia). All six models are also overlaid (All overlay). Related to Figure 4.

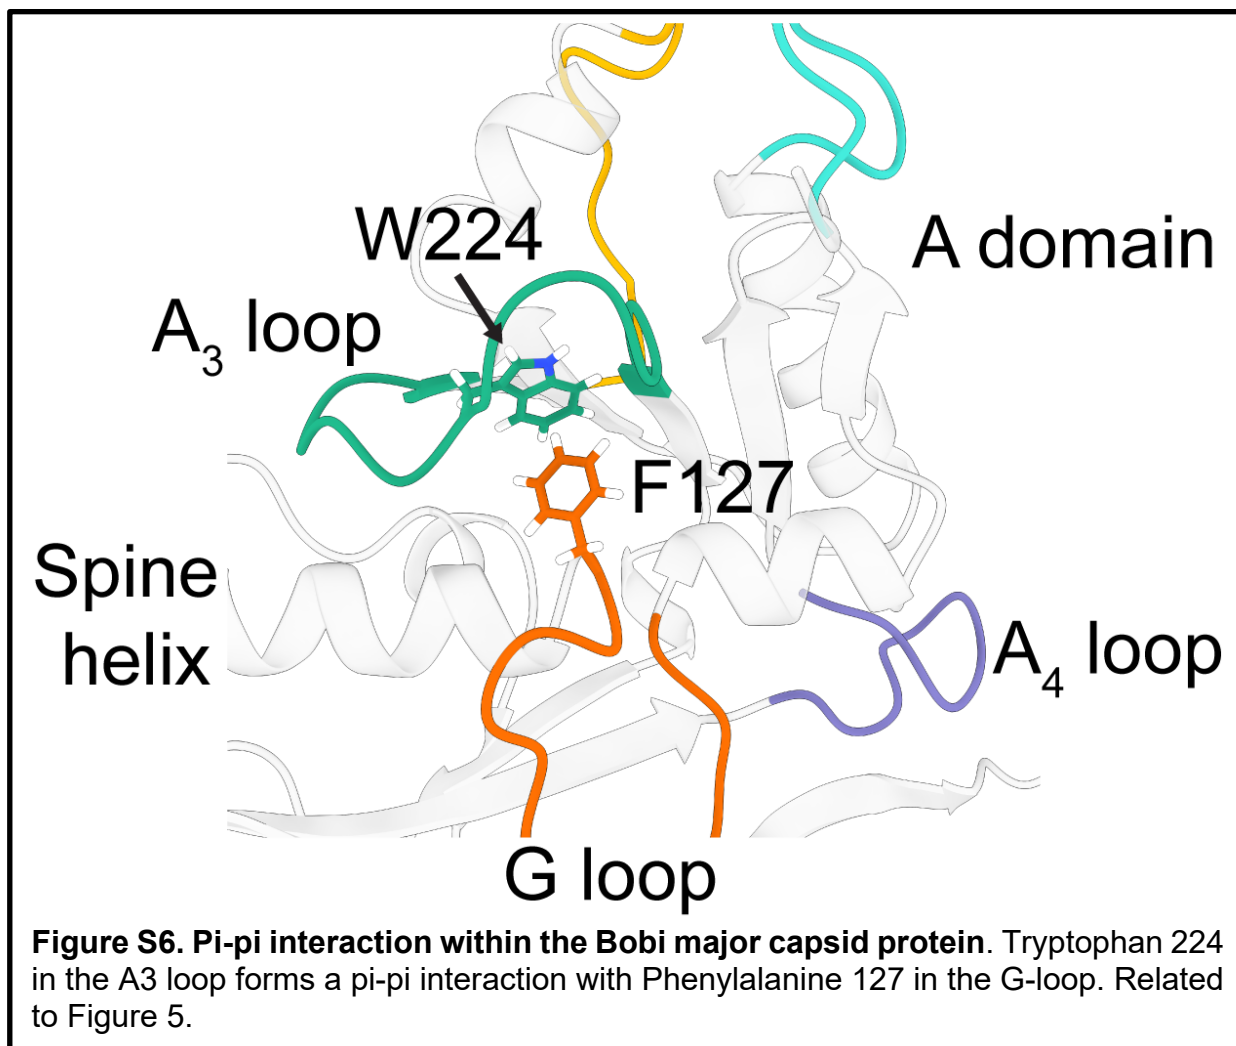

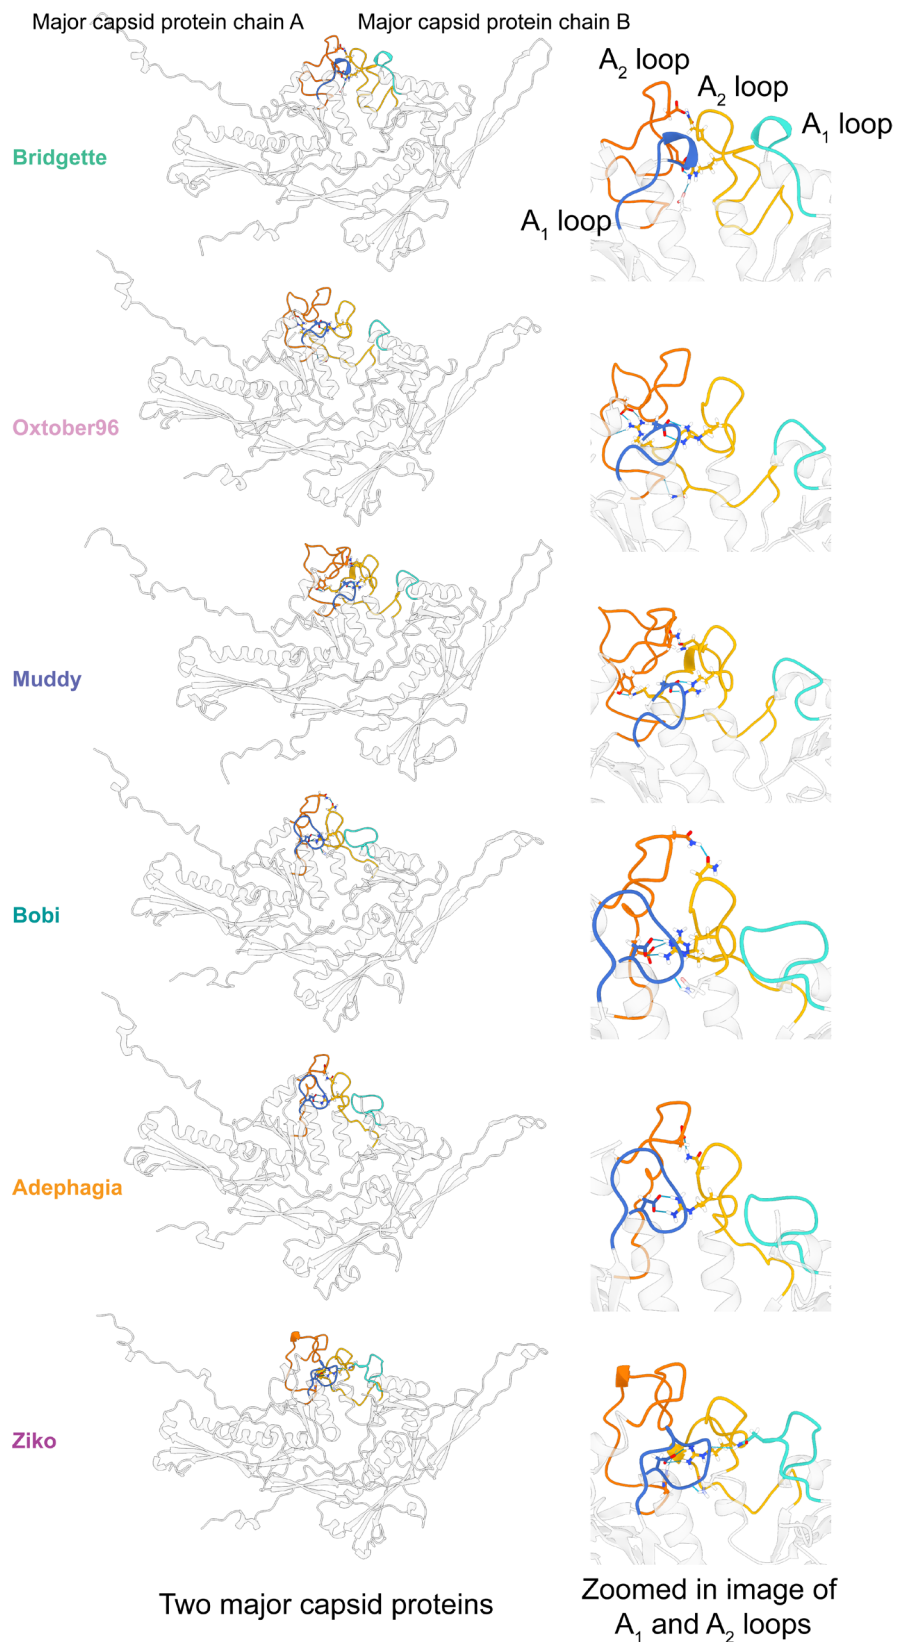

**Figure S7. A<sub>1</sub> and A<sub>2</sub> loop interactions of the Bobi-like (15199) bacteriophages. Related to Figure 6.**

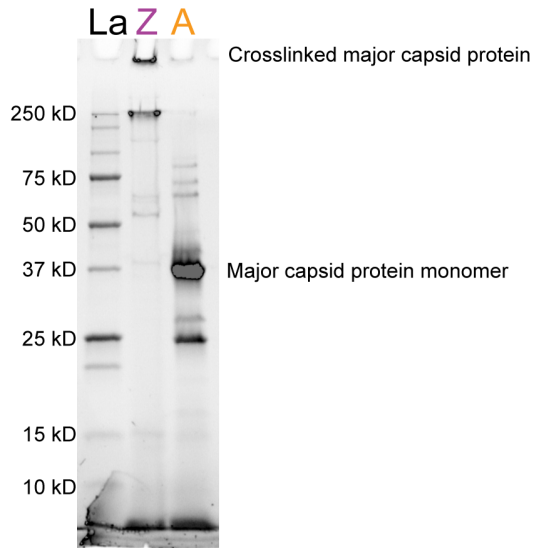

Predicted molecular weight of Ziko major capsid protein: 34.2 kD

Predicted molecular weight of Adephagia major capsid protein: 32.7 kD

**Figure S8. SDS-PAGE of Ziko (Z) and Adephagia (A) bacteriophages.** Cesium chloride purified capsids of Ziko and Adephagia were diluted to 1 mg/mL and mixed with Laemmli buffer and boiled for 10 minutes at 95°C. Boiled samples were loaded onto a 10% SDS-PAGE Bio-Rad stain-free TGX gel and run for 1 hour at 180 V. Protein bands were visualized using the stain-free TGX technology. Ladder (La) was Unstained Precision Plus Protein Standard from Bio-Rad. Related to Figure 7.

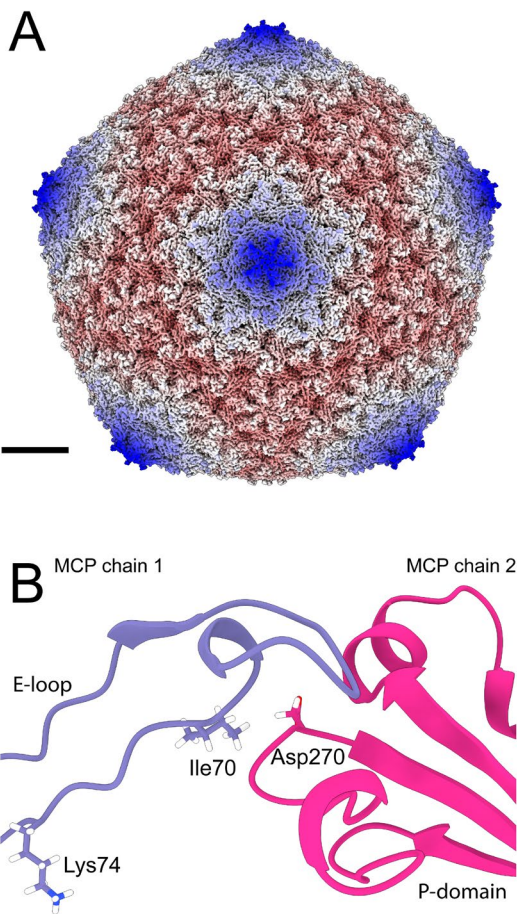

**Figure S9. Cain (K cluster, 15199 MCP pham) does not have an isopeptide bond.** A) Map of Cain, colored by radius using the same color scheme as in Figure 4. B) Image of two major capsid proteins of Cain around the 3-fold axis highlighting Asp270 and Ile70 that are in equivalent positions of the amino acids in Bobi that forms the isopeptide bond. Lys74 is also highlighted to show it is too distant to be part of an isopeptide bond with the P domain of MCP chain 2. Related to Figure 7.

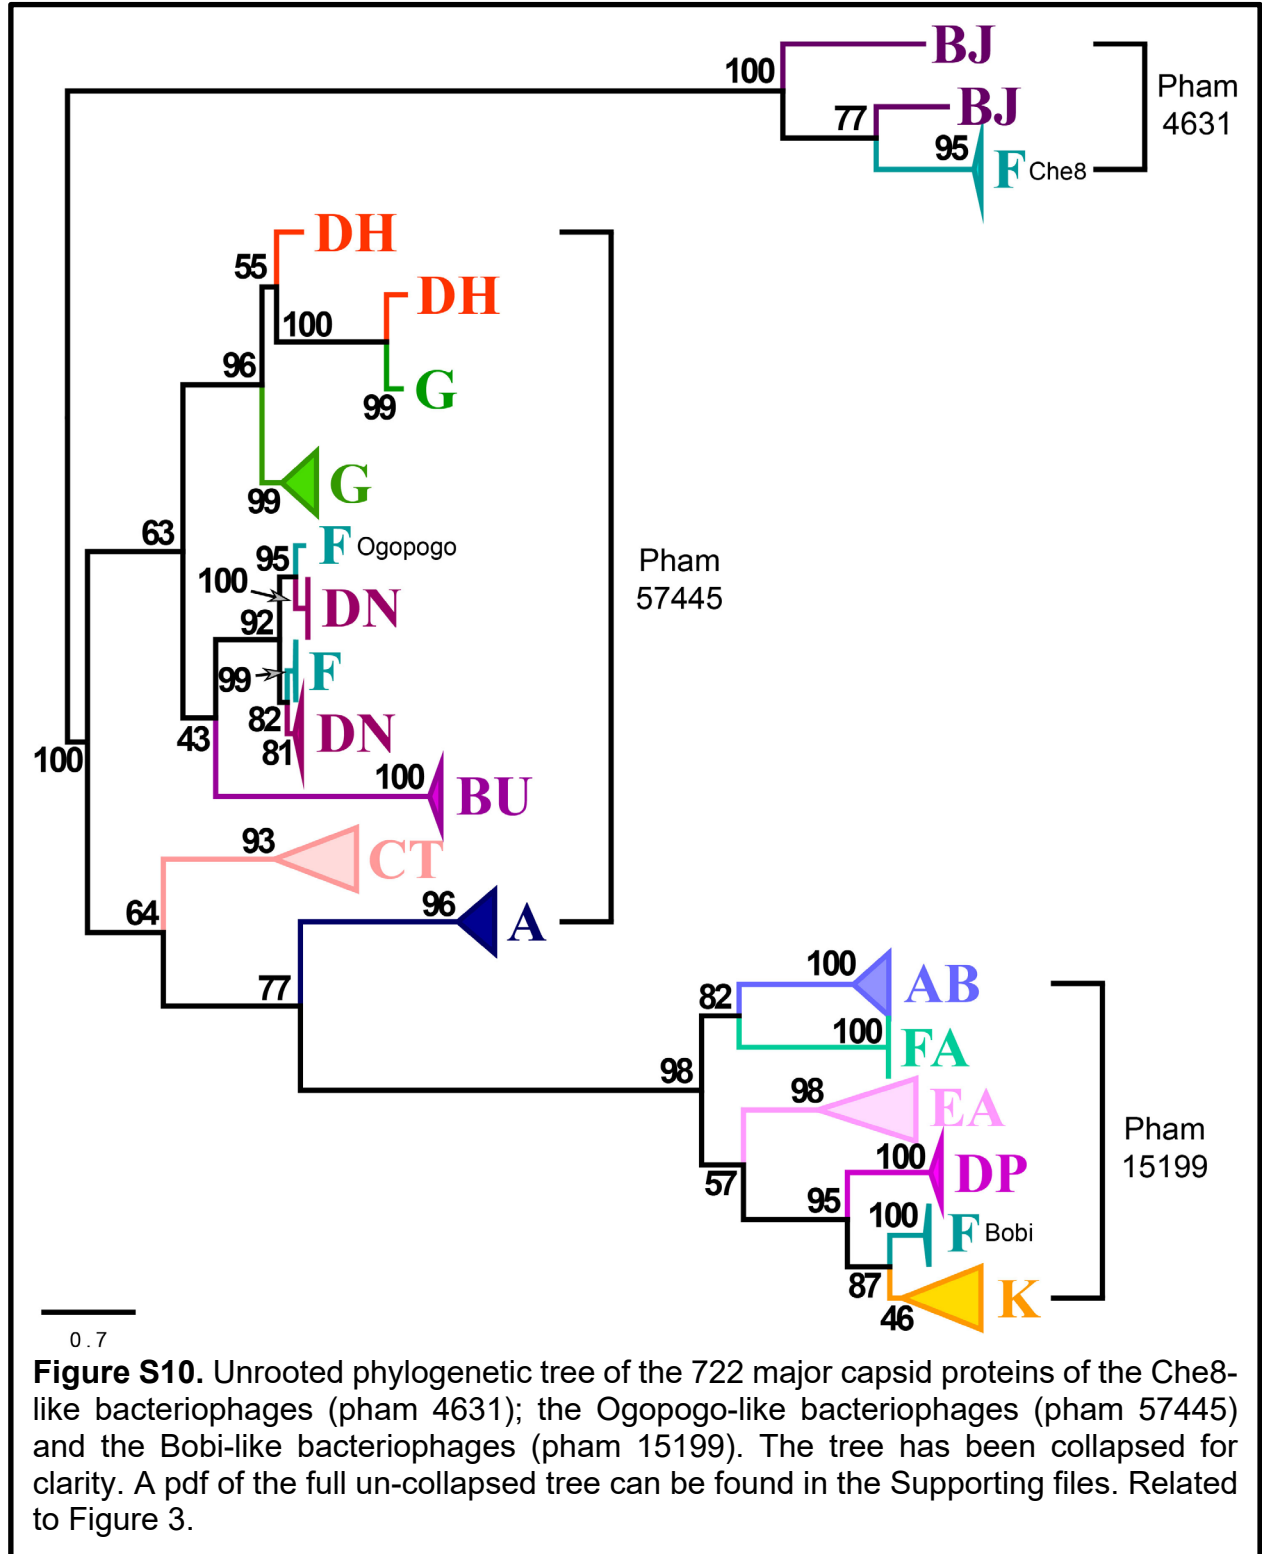

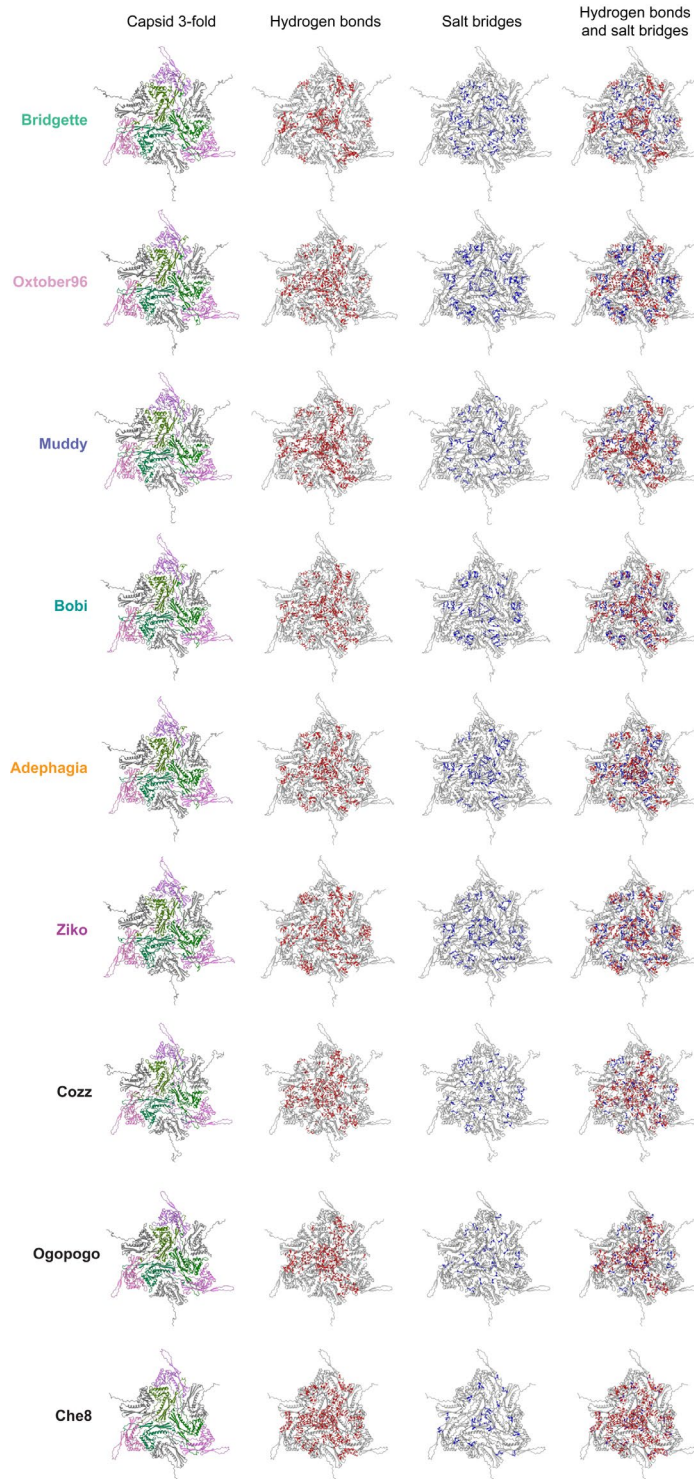

**Figure S11. The three-fold axes salt bridges and hydrogen bond distribution around the 3-fold axes of the capsid.** The nine major capsid proteins interacting around the three-fold axes are shown for each of the Bobi-like (15199) bacteriophage capsids. The hydrogen bond (red) and salt bridge (blue) networks are shown separately and overlaid. Related to Figure 7.
